# Supplementary material for: Delta-like 1 and Delta-like 4 differently require their extracellular domains for triggering Notch signaling in mice
Source: eLife. 2020 Jan 16;9:e50979. doi: 10.7554/eLife.50979 (PMC6986876; doi:10.7554/eLife.50979)
Supplement: Figure 1—source data 1. [file elife-50979-fig1-data1.xlsx]

## Sheet: Sheet1
The frequencies of B220+CD19+ B-lineage cells and Thy1+CD4+CD8+ immature T cells among the total cells of BM
	B220+CD19+ B cells (%)	Thy1.2+DP T cells (%)
WT	18.5	0.01
	13.4	0.0008
	16.1	0.002
	22	0.017
	21.1	0.02
	24.8	0.007
	22.9	0.034
	25.6	0.003
iD1	2.21	0.002
	3.16	0.005
	0.46	0.108
	0.27	0.006
iD4	5.87	9.44
	3.32	30.9
	1.14	15.6
	0.349	34.2
	0.491	37.9
	3.62	19.1
