# Supplementary material for: Delta-like 1 and Delta-like 4 differently require their extracellular domains for triggering Notch signaling in mice
Source: eLife. 2020 Jan 16;9:e50979. doi: 10.7554/eLife.50979 (PMC6986876; doi:10.7554/eLife.50979)
Supplement: Figure 2—source data 1. [file elife-50979-fig2-data1.xlsx]

## Sheet: Sheet1
	The effectiveness of serial expression (dMFI) of Dll1 or Dll4 on OP9 cells for the induction of CD25+ T-lineage cells (CD25+, %)
		dMFI	CD25+ (%)			dMFI	CD25+ (%)
	Dll1	34735	71.7		Dll4	11355	75.1
		26745	72.5			11471	73.2
		27460	70.1			11259	70.4
		28255	69.2			9706.4	73.8
		24448	68			9231.6	74
		18861	62.7			5731.6	42.6
		22660	42.8			6770.3	53.1
		19330	46.7			5897.3	40.1
		21034	28.1			5357.2	34.9
		10467	5.63			3020.2	7.03
		3161.5	3.39			1437	8.22
