# Supplementary material for: Delta-like 1 and Delta-like 4 differently require their extracellular domains for triggering Notch signaling in mice
Source: eLife. 2020 Jan 16;9:e50979. doi: 10.7554/eLife.50979 (PMC6986876; doi:10.7554/eLife.50979)
Supplement: Figure 2—source data 2. [file elife-50979-fig2-data2.xlsx]

## Sheet: Sheet1
	Measurement of the induction efficiencies for the CD25+ T-lineage cells
	of serial expression of Dll4 or Dll1 as EC50 as shown in Fig. 2B
		Dll4	Dll1
	Exp.1*	4225.1	15282
	Exp.2**	2620.8	16089
	Exp.3	5807.9	18759
	Average(Mean)	4217.9	16710
	SD	1593.6	1819.8
	*Data in Exp.1 (as a pilot experiment) were combined from 2 independent experiments
	(n=15 for Dll4, n=24 for Dll1; serial dilution points of Dox).
	**Data in Exp.2 were composed of 8 points for Dll4 and 12 points for Dll1 as serial dilution of Dox.
