# Supplementary material for: Delta-like 1 and Delta-like 4 differently require their extracellular domains for triggering Notch signaling in mice
Source: eLife. 2020 Jan 16;9:e50979. doi: 10.7554/eLife.50979 (PMC6986876; doi:10.7554/eLife.50979)
Supplement: Figure 2—source data 3. [file elife-50979-fig2-data3.xlsx]

## Sheet: Sheet1
The effectiveness of serial expression (dMFI) of Dll1 or Dll4 on OP9 cells for the induction of CD25+ T-lineage cells (CD25+, %)
Exp.1				Exp.2
	dMFI	CD25+ (%)			dMFI	CD25+ (%)
Dll1	1568.8	0.63		Dll1	1316.7	0.01
	1662.7	0.44			2345.5	0
	1607.2	0.05			5192.4	0.16
	895.3	0.32			10968	0.075
	1458	0.3			10181	3.36
	1339.2	0.06			8555.3	1.36
	1313.8	0.21			12378	28.7
	1464.7	0.09			15138	19.9
	1595.7	0.72			28160	63.2
	1352.6	1.48			32921	75.5
	1951.2	3.39			28766	71.2
	2535.2	5.19			20986	88.8
	5820.5	1.08
	12198	23.5			dMFI	CD25+ (%)
	31694	34.9		Dll4	611.3	0
	32091	39.6			365.5	5.58
	28513	51.5			2607.2	40.2
	33493	54.6			2932.1	75.3
	37746	56.1			3300.5	81.5
	33506	61.1			4048.9	78.2
	37539	54.9			4748	90.1
	36156	64.8			7480.9	77.5
	46547	58.1
	29270	64.5
	dMFI	CD25+ (%)
Dll4	711.1	0.38
	757.99	2.18
	972.2	2.18
	2613.2	14
	6953.7	59.3
	10013	62.4
	13065	60.1
	10696	68.3
	10791	64
	13269	70.4
	14189	66.3
	17190	66.5
	15901	73
	20766	71.6
	16776	72.2
