# Supplementary material for: Delta-like 1 and Delta-like 4 differently require their extracellular domains for triggering Notch signaling in mice
Source: eLife. 2020 Jan 16;9:e50979. doi: 10.7554/eLife.50979 (PMC6986876; doi:10.7554/eLife.50979)
Supplement: Figure 3—source data 1. [file elife-50979-fig3-data1.xlsx]

## Sheet: Sheet1
		The swapping chimeras of DSL domain and/or the 1st /2nd EGF repeats transduce Notch signaling.
		Fold activation	Mock	J1	D1	D1-D4DSL	D1-D4E1-2	D1-D4DSL/E1-2	D4	D4-D1DSL	D4-D1E1-2	D4-D1DSL/E1-2
	Notch1		1.067	13.28	11.26	2.033	1.316	0.8358	9.162	4.884	29.2	27.21
			0.7609	14.66	9.443	3.206	1.204	1.06	9.667	5.676	32.35	26.41
			1.173	22.4	11.59	2.457	1.497	1.023	10.34	6.006	29.66	27.16
		Average (Mean)	1	16.78	10.76	2.565	1.339	0.9729	9.723	5.522	30.4	26.93
		SD	0.214	4.916	1.156	0.594	0.1478	0.1202	0.591	0.5766	1.701	0.4481
	Lfng-N1		0.77	6.651	63.47	24.41	5.724	1.145	51.16	21.1	77.92	60.22
			1.184	5.289	59.7	22.86	4.954	1.243	46.66	17.7	52.84	61.09
			1.046	9.099	47.8	22.56	4.342	0.9868	41.23	19.05	43.34	47.33
		Average (Mean)	1	7.013	56.99	23.28	5.007	1.125	46.35	19.28	58.03	56.21
		SD	0.2108	1.931	8.179	0.9929	0.6925	0.1293	4.972	1.712	17.87	7.705
		These data were obtained by three independent experiments as biological replicates.
