# Supplementary material for: Delta-like 1 and Delta-like 4 differently require their extracellular domains for triggering Notch signaling in mice
Source: eLife. 2020 Jan 16;9:e50979. doi: 10.7554/eLife.50979 (PMC6986876; doi:10.7554/eLife.50979)
Supplement: Figure 4—source data 1. [file elife-50979-fig4-data1.xlsx]

## Sheet: Sheet1
		The MNNL swapping chimeras transduce Notch signaling.
			Fold activation	Mock	J1	D1	D1-D4MNNL	D4	D4-D1MNNL
		Notch1		0.6197	19.85	16.61	14.51	8.155	1.193
				0.8169	23	15.42	7.831	7.028	1.961
				1.563	37.31	21.68	7.732	11.32	0.9852
			Average (Mean)	1	26.72	17.9	10.02	8.834	1.38
			SD	0.4976	9.305	3.324	3.885	2.225	0.514
		Lfng-N1		0.8571	8.183	33.38	38.84	26.97	2.89
				0.7634	5.853	55.61	34.37	34.93	4.864
				1.38	8.277	40.85	39.86	47.17	5.681
			Average (Mean)	1	7.438	43.28	37.69	36.36	4.478
			SD	0.332	1.373	11.31	2.92	10.18	1.435
			These data were obtained by three independent experiments as biological replicates.
