# Supplementary material for: Delta-like 1 and Delta-like 4 differently require their extracellular domains for triggering Notch signaling in mice
Source: eLife. 2020 Jan 16;9:e50979. doi: 10.7554/eLife.50979 (PMC6986876; doi:10.7554/eLife.50979)
Supplement: Figure 6—source data 1. [file elife-50979-fig6-data1.xlsx]

## Sheet: Sheet1
		Inducing activity of Notch signaling in vitro was examined by the co-cultures of NotchL and Notch1/Lfng transfectants.
			Fold activation	Mock	Dll1	D1-D4MNNL	Dll4	D4-D1MNNL	Dll4-P3
		Lfng-N1		0.7391	162.1	121.1	93.91	10.09	23.85
				1.109	125.1	76.91	90.98	11.22	37.28
				1.152	171.1	114.5	126.5	12.94	32.37
			Average(Mean)	1	152.8	104.2	103.8	11.42	31.17
			SD	0.227	24.38	23.84	19.72	1.44	6.8
			These data were obtained by three independent experiments as biological replicates.
